# Supplementary material
Source: Elsevier journal article supplement (https://www.sciencedirect.com/science/article/pii/S1575092215003368)
Supplement: mmc1 [file S1575092215003368:mmc1.pdf]

| CUESTIONARIO DE UNIDADES DIABETES Y EMBARAZO EN ESPAÑA                                                                                            |                                                                                                                     |
|---------------------------------------------------------------------------------------------------------------------------------------------------|---------------------------------------------------------------------------------------------------------------------|
| DATOS DE FILIACIÓN DEL CENTRO                                                                                                                     |                                                                                                                     |
| Nombre y apellidos de la persona que ha cumplimentado el cuestionario                                                                             |                                                                                                                     |
| Nombre del Centro de trabajo                                                                                                                      |                                                                                                                     |
| Características del centro de trabajo. Señalar solo una que corresponda al de mayor grado.                                                        | Hospital General Universitario                                                                                      |
|                                                                                                                                                   | Hospital General                                                                                                    |
|                                                                                                                                                   | Hospital monográfico                                                                                                |
|                                                                                                                                                   | Centro de especialidades                                                                                            |
|                                                                                                                                                   | Otros, indicar cual en casilla inferior                                                                             |
| Indicar financiación preferente del centro. Señalar solo una                                                                                      | Público con independencia del organismo del que dependa                                                             |
|                                                                                                                                                   | Privado                                                                                                             |
|                                                                                                                                                   | Privado con concierto con sistema público de salud                                                                  |
| Población de referencia que atiende el centro (dejar en blanco si no asignada)                                                                    |                                                                                                                     |
| Nº de partos que atendisteis el pasado año 2013 en tu centro (solo si hospital)                                                                   |                                                                                                                     |
| Servicio o Unidad de Gestión Clínica al que pertenece si procede                                                                                  |                                                                                                                     |
| Población donde está situado el centro                                                                                                            |                                                                                                                     |
| Comunidad Autónoma                                                                                                                                |                                                                                                                     |
| CUESTIONARIO                                                                                                                                      |                                                                                                                     |
| 1. ¿Existe en tu centro <u>una</u> consulta o unidad donde se atienden a la <u>mayoría</u> de las mujeres gestantes y diabetes. Señalar solo una. | si, en la misma consulta Endocrino y Obstetra                                                                       |
|                                                                                                                                                   | si, en consultas distintas Endocrino y Obstetra, trabajando de manera coordinada mediante una aplicación telemática |
|                                                                                                                                                   | si, en consultas distintas Endocrino y Obstetra, trabajando de manera coordinada sin soporte telemático             |
|                                                                                                                                                   | si, pero solo en caso de Endocrinología                                                                             |

|                                                                                                                                                        |                                                                                                         |
|--------------------------------------------------------------------------------------------------------------------------------------------------------|---------------------------------------------------------------------------------------------------------|
|                                                                                                                                                        | si, pero solo en caso de Obstetricia                                                                    |
|                                                                                                                                                        | no, en mi centro se atiende en distintas consultas o por distintos profesionales endocrinos y obstetras |
|                                                                                                                                                        | Añadir algún comentario al respecto si precisa                                                          |
| 2. En tu centro existe una o varias educadoras en diabetes que atiendan específicamente a las gestantes. Señalar solo una.                             | si                                                                                                      |
|                                                                                                                                                        | no                                                                                                      |
|                                                                                                                                                        | si has marcado que si, indica cuantas                                                                   |
| 3. ¿Qué funciones cumple la educadora en diabetes en el manejo de la gestante? Señalar tantas como proceda.                                            | Educación en la diabetes gestacional (DG)                                                               |
|                                                                                                                                                        | Educación en la diabetes pregestacional (DPG)                                                           |
|                                                                                                                                                        | Seguimiento en la DG                                                                                    |
|                                                                                                                                                        | Seguimiento en la DPG                                                                                   |
|                                                                                                                                                        | Otros, indicar cuál en casilla inferior                                                                 |
| 4. ¿Existe en tu centro aplicación telemática entre pacientes y facultativos/educadoras para el manejo de la gestante con diabetes?. Señalar solo una. | si                                                                                                      |
|                                                                                                                                                        | no                                                                                                      |
| <b>DIABETES GESTACIONAL (DG)</b>                                                                                                                       |                                                                                                         |
| 5. El cribado/diagnóstico de DG en el 1º Trimestre se realiza: Señalar solo una.                                                                       | Si universal                                                                                            |
|                                                                                                                                                        | Si, pero solo grupos de riesgo                                                                          |
|                                                                                                                                                        | No                                                                                                      |
| 6. El cribado/diagnóstico de DG durante las 24-28 semanas se realiza: Señalar solo una.                                                                | Si universal                                                                                            |
|                                                                                                                                                        | Si, pero solo grupos de riesgo                                                                          |
|                                                                                                                                                        | No                                                                                                      |
| 7. El cribado/diagnóstico de DG después de las 24-28 semanas se realiza: Señalar solo una.                                                             | Si universal                                                                                            |

|                                                                                                                                    |                                                                                                                                                                                          |
|------------------------------------------------------------------------------------------------------------------------------------|------------------------------------------------------------------------------------------------------------------------------------------------------------------------------------------|
|                                                                                                                                    | Si, pero solo grupos de riesgo                                                                                                                                                           |
|                                                                                                                                    | No                                                                                                                                                                                       |
| 8. El diagnóstico de DG se realiza: Señalar solo una.                                                                              | 1 paso (SOG 75 g)                                                                                                                                                                        |
|                                                                                                                                    | 2 pasos (SOG 50 y SOG de 100 g de confirmación)                                                                                                                                          |
| 9. Si usas el cribado para DG con 50g indicar punto de corte: Señalar solo una.                                                    | 140 mg/dL                                                                                                                                                                                |
|                                                                                                                                    | Otros: indicar cuál en casilla inferior                                                                                                                                                  |
|                                                                                                                                    |                                                                                                                                                                                          |
| 10. Si usas 2 pasos, que puntos de corte consideráis patológicos en la SOG de 100 g. Señalar solo una.                             | 95-180-155-140 mg/dL                                                                                                                                                                     |
|                                                                                                                                    | 105-190-165-145 mg/dL                                                                                                                                                                    |
| 11. En tu centro <u>el seguimiento de las mujeres con DG</u> , se realiza a: Señalar solo una.                                     | Todas las DG                                                                                                                                                                             |
|                                                                                                                                    | Sólo las de menor complejidad (tratamiento sólo con dieta)                                                                                                                               |
|                                                                                                                                    | Sólo a las de mayor complejidad (tratamiento con insulina), las de menor complejidad se siguen en centro de especialidades extrahospitalaria que trabajan coordinadas con nuestro centro |
|                                                                                                                                    | A las de mayor complejidad, las de menor complejidad se siguen en atención primaria                                                                                                      |
|                                                                                                                                    | Añadir algún comentario al respecto si precisa                                                                                                                                           |
| 12. El <u>seguimiento metabólico</u> (dieta, ejercicio y glucemias) de las mujeres con DG, lo realiza fundamentalmente:            | Facultativo exclusivamente                                                                                                                                                               |
|                                                                                                                                    | Enfermera educadoras siguiendo protocolo                                                                                                                                                 |
|                                                                                                                                    | Facultativo y enfermera educadora                                                                                                                                                        |
| 13. En la <u>atención diabetológica</u> de las mujeres con DG indique lo que se realice en su centro de trabajo. Señalar solo una. | Existe al menos un profesional específico de referencia para el seguimiento de estos pacientes                                                                                           |
|                                                                                                                                    | Las atiende cualquier profesional                                                                                                                                                        |
| 14. En la <u>atención obstétrica</u> de las mujeres con DG indique lo que se realice en su centro de trabajo. Señalar solo una.    | Existe al menos un profesional específico de referencia para el seguimiento de estos pacientes                                                                                           |

|                                                                                                                                                                     |                                                                                                                                |
|---------------------------------------------------------------------------------------------------------------------------------------------------------------------|--------------------------------------------------------------------------------------------------------------------------------|
|                                                                                                                                                                     | Las atiende cualquier profesional                                                                                              |
| 15. El <u>seguimiento</u> posparto se realiza de la siguiente manera. Señalar solo una.                                                                             | No se indican pruebas posparto, salvo excepciones                                                                              |
|                                                                                                                                                                     | Se indica pruebas a realizar y el seguimiento lo hace atención primaria, salvo en excepciones                                  |
|                                                                                                                                                                     | Tanto pruebas como seguimiento se realiza en el mismo centro                                                                   |
|                                                                                                                                                                     | Añadir algún comentario al respecto si precisa                                                                                 |
| 16. Indicar que pruebas se realizan en el posparto de manera sistemática. Señalar tantas como procedan.                                                             | Glucemia basal                                                                                                                 |
|                                                                                                                                                                     | SOG 75 g                                                                                                                       |
|                                                                                                                                                                     | HbA1c                                                                                                                          |
| 17. Cuantas mujeres con DG valorasteis en la consulta o Unidad de Diabetes y Embarazo en tu centro en el 2013. Indicar todas aunque se valoren en varias consultas. |                                                                                                                                |
| 18. ¿Podrías indicar el % de mujeres con DG que precisaron insulinización en tu centro en el 2013?                                                                  |                                                                                                                                |
| <b>DIABETES PREGESTACIONAL (DPG)</b>                                                                                                                                |                                                                                                                                |
| 19. ¿Cómo se realiza la <u>clínica preconcepcional</u> en tu centro?. Señalar solo una.                                                                             | En la unidad o consulta de diabetes y embarazo atendidas por un endocrino y un obstetra                                        |
|                                                                                                                                                                     | En consultas individuales por distintos profesionales, sean por endocrinos u obstetras                                         |
|                                                                                                                                                                     | No se hace clínica preconcepcional                                                                                             |
| 20. En tu centro la <u>atención no programada de mujeres con DPG</u> ¿Cómo lo habéis solucionado? Señalar solo una.                                                 | No lo tengo solucionado                                                                                                        |
|                                                                                                                                                                     | A través del hospital del día, con atención inmediata                                                                          |
|                                                                                                                                                                     | Incluyendo a la paciente en la consulta programada específica de diabetes y gestación                                          |
|                                                                                                                                                                     | Incluyendo a la paciente en el primer hueco libre en cualquiera de las consultas sean o no específicas de diabetes y gestación |

|                                                                                                                                                                                                                                                                                                   |                                                                                                |
|---------------------------------------------------------------------------------------------------------------------------------------------------------------------------------------------------------------------------------------------------------------------------------------------------|------------------------------------------------------------------------------------------------|
| 21. En la <u>atención diabetológica</u> de las mujeres con DPG indique lo que se realice en su centro de trabajo. Señalar solo una.                                                                                                                                                               | Existe al menos un profesional específico de referencia para el seguimiento de estos pacientes |
|                                                                                                                                                                                                                                                                                                   | Las atiende cualquier profesional                                                              |
| 22. En la <u>atención obstétrica</u> de las mujeres con DPG indique lo que se realice en su centro de trabajo. Señalar solo una.                                                                                                                                                                  | Existe al menos un profesional específico de referencia para el seguimiento de estos pacientes |
|                                                                                                                                                                                                                                                                                                   | Las atiende cualquier profesional                                                              |
| 23. En tu centro en la atención de mujeres con DPG, indicar si se utilizan las siguientes opciones. Señalar tantas como procedan.                                                                                                                                                                 | ISCI o Bomba de insulina                                                                       |
|                                                                                                                                                                                                                                                                                                   | Sensor de glucemias                                                                            |
|                                                                                                                                                                                                                                                                                                   | Calculadores de bolo                                                                           |
| 24. El <u>seguimiento posparto</u> tras el alta, en mujeres con DPG, se realiza de la siguiente manera. Señalar solo una.                                                                                                                                                                         | En la misma consulta donde se ha realizado el seguimiento durante la gestación                 |
|                                                                                                                                                                                                                                                                                                   | Se remite al profesional o centro donde se realizaba seguimiento previo a la gestación         |
| 25. Cuantas <u>gestantes con DPG</u> valorasteis en la consulta o Unidad de Diabetes y Embarazo en tu centro en el 2013. Indicar todas aunque se valoren en varias consultas y si no conoce tipos indicar sólo el total.                                                                          | DM1                                                                                            |
|                                                                                                                                                                                                                                                                                                   | DM2                                                                                            |
|                                                                                                                                                                                                                                                                                                   | Otras                                                                                          |
|                                                                                                                                                                                                                                                                                                   | Nº de gestantes en total                                                                       |
| <b>INDICADORES DE EXCELENCIA DE TU CENTRO EN ATENCIÓN EN DIABETES Y GESTACIÓN</b>                                                                                                                                                                                                                 |                                                                                                |
| 26. Tu centro ¿participa en la formación y reciclaje de profesionales implicados en la asistencia de mujeres con diabetes y embarazo? Señalar solo una.                                                                                                                                           | si                                                                                             |
|                                                                                                                                                                                                                                                                                                   | no                                                                                             |
| 27. Tu centro ¿establece controles de calidad en la asistencia de mujeres con diabetes y gestación promoviendo protocolos de actuación y llevando registros de la misma?. Si se lleva registros indicar al menos nº de gestantes seguidas durante año 2013 (preguntas 17 y 24). Señalar solo una. | si                                                                                             |
|                                                                                                                                                                                                                                                                                                   | no                                                                                             |
| 28. Tu centro ¿participa en proyectos de investigación, estudios multicéntricos o aporta casuística que pueda contribuir a mejorar el conocimiento en esta parcela de la asistencia?. Señalar solo una.                                                                                           | si                                                                                             |
|                                                                                                                                                                                                                                                                                                   | no                                                                                             |
